# Supplementary material for: Effectiveness of biomarker-based exclusion of ventilator-acquired pneumonia to reduce antibiotic use (VAPrapid-2): study protocol for a randomised controlled trial
Source: Trials. 2016 Jul 16;17:318. doi: 10.1186/s13063-016-1442-x (PMC4947254; doi:10.1186/s13063-016-1442-x)
Supplement: Additional file 2: — VAPrapid-2 Logic Model. (PDF 87 kb) [file 13063_2016_1442_MOESM2_ESM.pdf]

## VAPrapid-2 Logic Model

Situation: Suspected VAP is only confirmed in approximately 30% of cases - there is a need to improve antibiotic stewardship.

| Inputs                                                                                                                                                                                                    | Outputs                                                                                                                                                                                                                                   |                                                                                                                                                  | Outcomes -- Impact                                                                                                                                                                                               |                                                                                                                                                                                                                                |                                                                                                                                                                                  |
|-----------------------------------------------------------------------------------------------------------------------------------------------------------------------------------------------------------|-------------------------------------------------------------------------------------------------------------------------------------------------------------------------------------------------------------------------------------------|--------------------------------------------------------------------------------------------------------------------------------------------------|------------------------------------------------------------------------------------------------------------------------------------------------------------------------------------------------------------------|--------------------------------------------------------------------------------------------------------------------------------------------------------------------------------------------------------------------------------|----------------------------------------------------------------------------------------------------------------------------------------------------------------------------------|
|                                                                                                                                                                                                           | Activities                                                                                                                                                                                                                                | Participation                                                                                                                                    | Short                                                                                                                                                                                                            | Medium                                                                                                                                                                                                                         | Long                                                                                                                                                                             |
| <b><u>Staff:</u></b><br>Research nurse<br>Staff nurse<br>Clinician<br>Laboratory technician<br><br><b><u>Resources:</u></b><br>Bronchoscopy equipment<br>Staff time<br>Laboratory availability<br>Funding | Screen patient<br>Recruit patient<br>Select appropriately trained staff<br>Undertake sampling process<br>Sample processed at laboratory<br>Return results in a timely fashion<br>Willingness to participate<br>Belief in the intervention | Patient<br>Family member<br>Research nurse<br>Staff nurse<br>Clinician<br>Principal investigator and/or co-investigator<br>Laboratory technician | Test result<br>Antibiotics discontinued<br>Antibiotics continued<br>Development of trial skill competencies<br>Others trained in trial skills<br>Increase in knowledge in ICU of the management/diagnosis of VAP | Improved antibiotic stewardship<br>Introduction to the concept of using biomarkers as a tool to improve antibiotic stewardship<br>Improved diagnosis of VAP<br>Increase in knowledge in ICU of the management/diagnosis of VAP | Decrease AMR in the wider population<br>Sustained antibiotic stewardship<br>Reduced healthcare resource usage<br>Increase in knowledge in ICU of the management/diagnosis of VAP |

### Assumptions

Sites will appropriately identify suspected VAP.  
 The prevalence of VAP will be same as the validation study (approx. 30%).  
 Patients will be recruited into the VAPrapid-2 trial.  
 Patient's antibiotic therapy will follow trial protocol.  
 The VAPrapid-2 standard operating procedure is clinically acceptable.  
 Clinical staff see the test as beneficial at both individual and societal level, and engage with it.

### External Factors

Normal working practices e.g. overnight antibiotics started by a trainee unfamiliar with the trial.  
 Balancing other work commitments - where the trial lies in priorities.  
 Decisions made outside of the trial protocol.  
 Role of microbiology in prescribing decisions.  
 Individual perception of risk-taking.  
 Attitude towards / perception of undertaking a bronchoscopy, and that of the biomarker test.  
 Other sources of infection.
